# Supplementary material for: Co-Delivery of CPT-11 and Panobinostat with Anti-GD2 Antibody Conjugated Immunoliposomes for Targeted Combination Chemotherapy
Source: MDPI journal article supplement (doi:10.3390/cancers12113211), 2020-10-31
Supplement: s1 [file s1]

# Supplementary Materials: Co-Delivery of CPT-11 and Panobinostat With Anti-GD2 Antibody Conjugated Immunoliposomes for Targeted Combination Chemotherapy

Gils Jose, Yu-Jen Lu, Jung-Tung Hung, Alice L. Yu and Jyh-Ping Chen

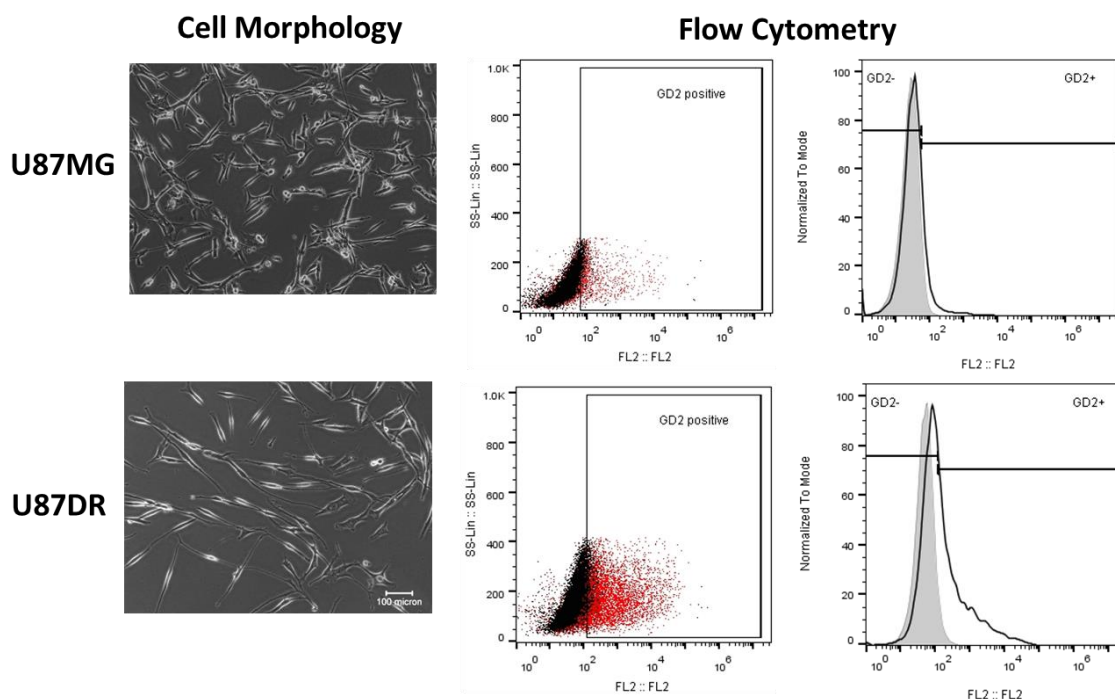

**Figure S1.** The cell morphology and the expression levels of GD2 of U87MG and U87DR cell lines from flow cytometry analysis (bar = 100  $\mu\text{m}$ ).

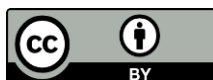

© 2020 by the authors. Licensee MDPI, Basel, Switzerland. This article is an open access article distributed under the terms and conditions of the Creative Commons Attribution (CC BY) license (<http://creativecommons.org/licenses/by/4.0/>).
